# Supplementary material
Source: HighWire-hosted journal article supplement (https://www.cmajopen.ca/highwire/filestream/87395/field_highwire_adjunct_files/4/2020-0152-5-at.pdf)
Supplement: 2020-0152-5-at.pdf [file 2020-0152-5-at.pdf]

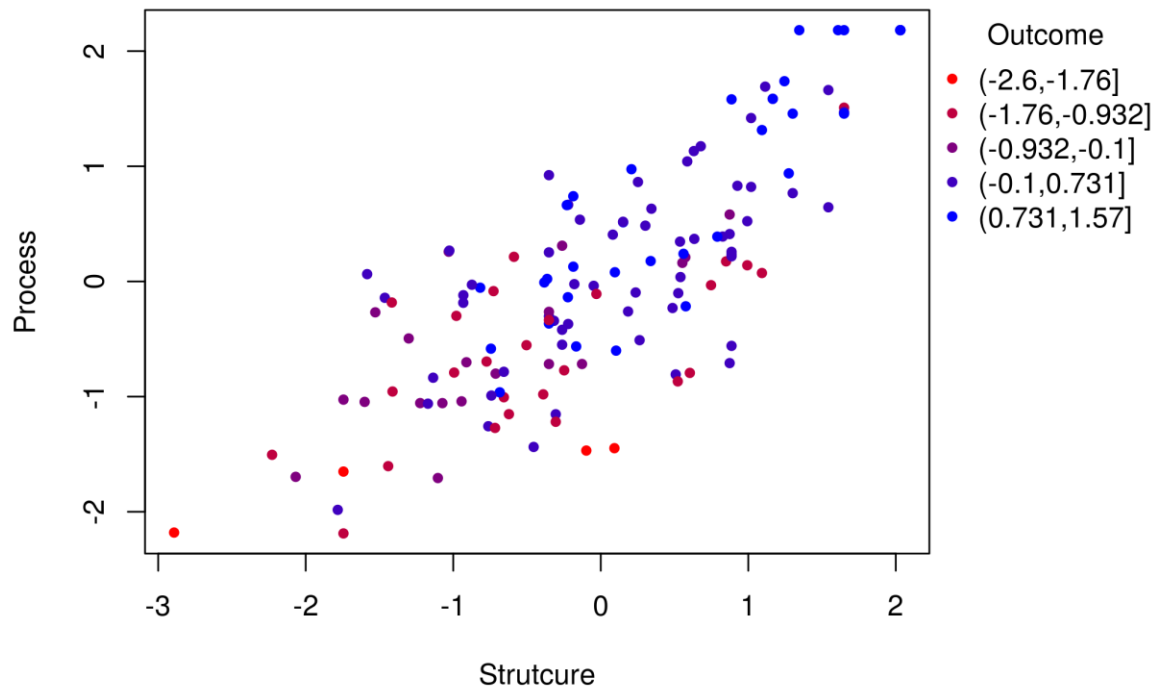

## Appendix 5 (as supplied by authors)

This figure presents a scatter plot of Structure and Process using Outcomes .

Each point represents one respondent organization, and its coordinates on the plot are determined based on the organization's responses to individual survey items and each survey item's weight in contributing to each of the three factors. A heatmap colour scheme aids visualization, whereby blue and red points correspond to low and high Outcomes respectively.

Structures and Processes show a positive linear relationship with Outcomes. High Outcomes factor scores are observed when organizations show high Structures and Processes factor scores.

Appendix 5, as supplied by authors. Appendix to: Sunderji N, Ion A, Tang V, et al. Conceptualizing success factors for patient engagement in patient medical homes: a cross-sectional survey. *CMAJ Open* 2021. DOI:10.9778/cmajo.20200152. Copyright © 2021 The Author(s) or their employer(s).

To receive this resource in an accessible format, please contact us at [cmajgroup@cmaj.ca](mailto:cmajgroup@cmaj.ca).
